# Supplementary material for: Galectin-9 blockade synergizes with ATM inhibition to induce potent anti-tumor immunity
Source: PubMed Central journal article supplement (PMC9909994; doi:10.7150/ijbs.79852), 2023-01-16
Supplement: ijbsv19p0981s1.pdf [file ijbsv19p0981s1.pdf]

## Supporting information

Fig.S1

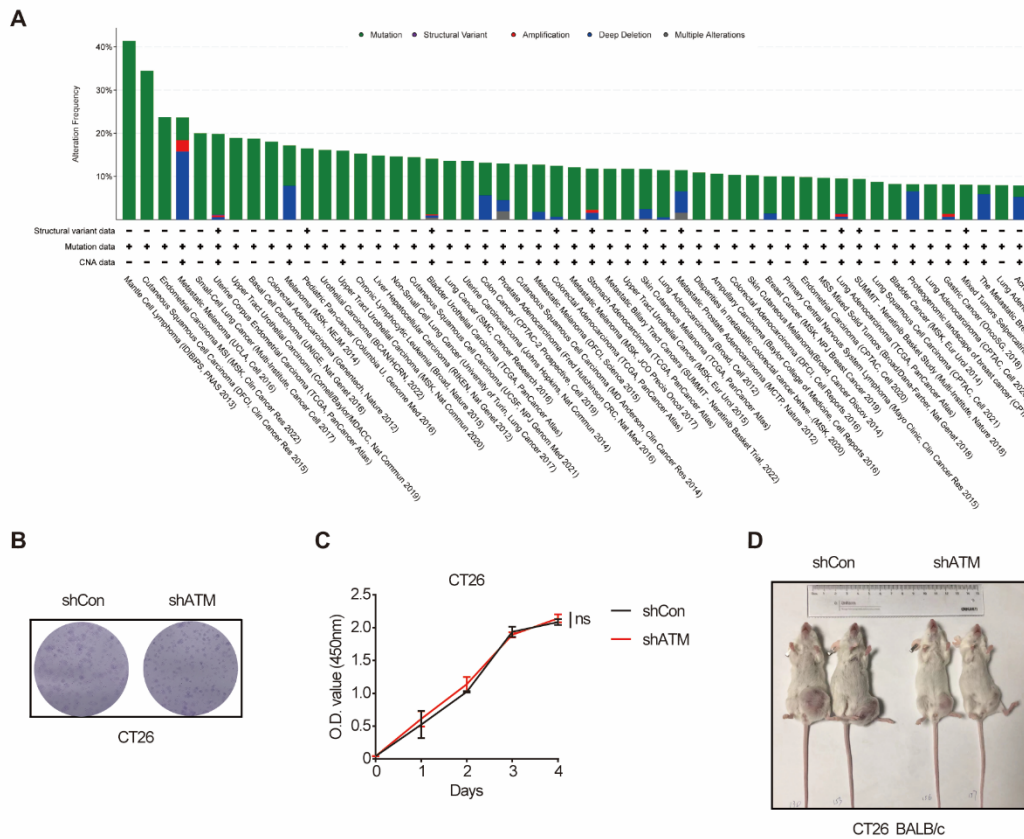

**Fig.S1 ATM gene alterations in human cancers and the effect of ATM depletion on murine tumor growth in vitro and in vivo. A.** The frequency of ATM gene alterations in various cancer types. ATM was queried against all entries in the curated non-redundant dataset on c-Bioportal, accessed November 2022. Green: mutation; purple: structural variant; red: amplification; blue: deep deletion; dark grey: multiple alterations. **B.** Growth evaluation of vector control or ATM-KO CT26 cells by crystal violet staining. **C.** Growth evaluation of vector control or ATM-KO CT26 cells by CCK-8 assay. **D.** The size of tumors of individual BALB/c mice inoculated with vector control or ATM-KO CT26 cells.

**Fig.S2**

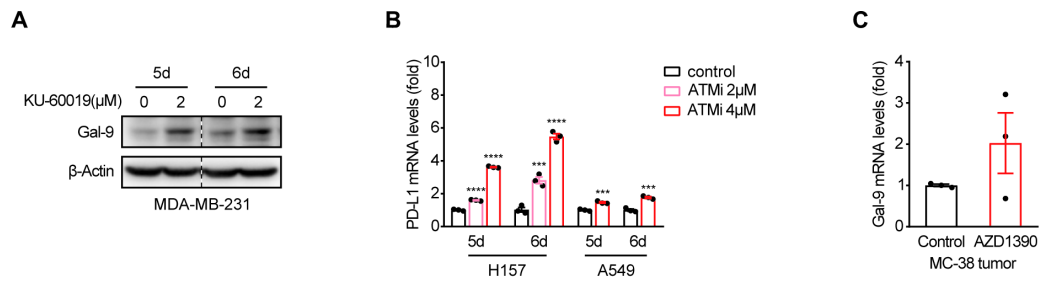

**Fig.S2 The effect of ATM inhibition on Gal-9 or PD-L1 expression in tumor cells in vitro and in vivo. A.** Immunoblot analysis of Gal-9 in MDA-MB-231 cells treated with KU-60019(2 μmol/L or 4 μmol/L) or DMSO (vehicle control) for indicated time. **B.** RT-qPCR analysis of PD-L1 mRNA levels in H157 and A549 cancer cells in response to KU-60019(2 μmol/L or 4 μmol/L) or DMSO (vehicle control) for indicated time. **C.** RT-qPCR analysis of Gal-9 in AZD1390-treated MC38 tumors harvested from C57BL/6J syngeneic mice. n.s., not significant; \*, P < 0.05; \*\*, P < 0.01; \*\*\*, P < 0.001.

**Fig.S3**

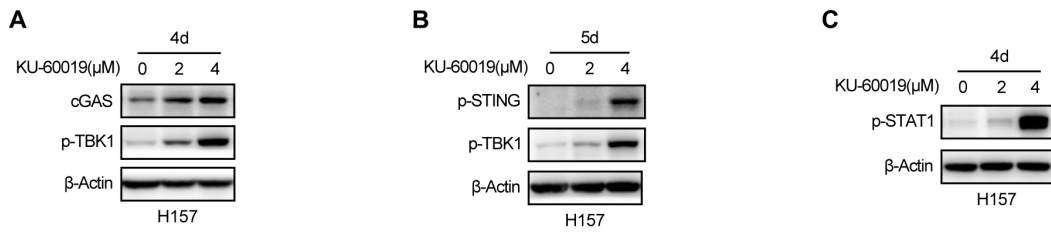

**Fig.S3 ATM inhibition induces cGAS-STING-IFN  $\beta$  activation. A.** Immunoblot analysis of cGAS, p-STING and p-TBK1 levels in H157 cells in response to KU-60019(2  $\mu$ mol/L or 4  $\mu$ mol/L) or DMSO (vehicle control) for 4 or 5 days. **B.** Immunoblot analysis of p-STAT1 in H157 cells in response to KU-60019(2  $\mu$ mol/L or 4  $\mu$ mol/L) or DMSO (vehicle control) for 4 days. n.s., not significant; \*,  $P < 0.05$ ; \*\*,  $P < 0.01$ ; \*\*\*,  $P < 0.001$ .

**Fig.S4**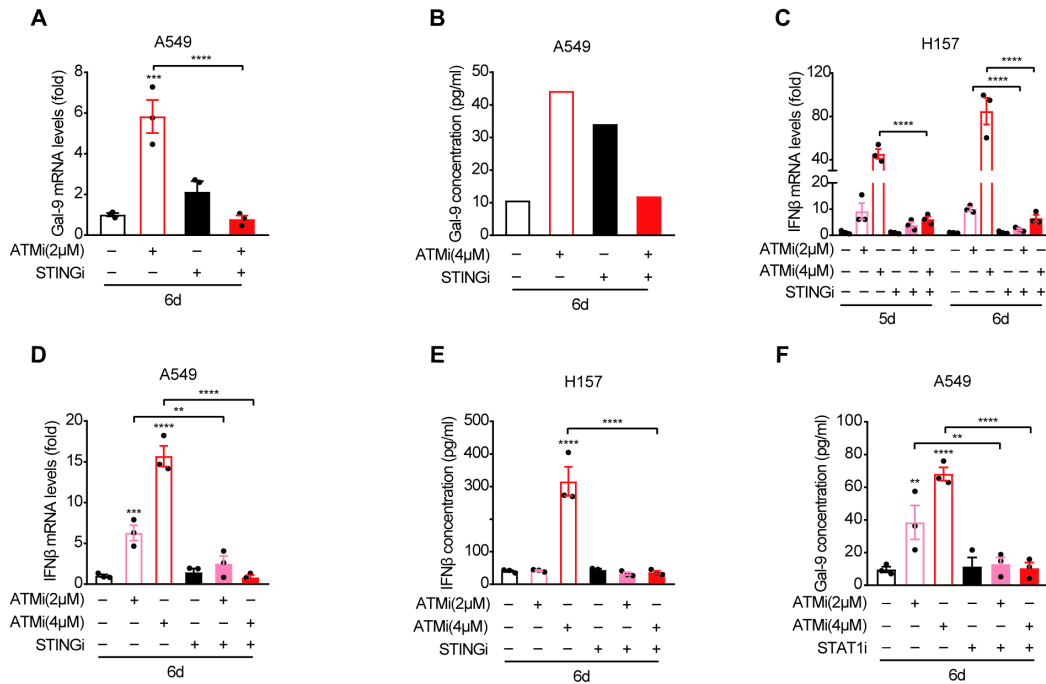

**Fig.S4 STING or STAT1 inhibition abrogates Gal-9 induction in response to ATMi treatment.** **A.** RT-qPCR analysis of Gal-9 in A549 cells concurrently treated with KU-60019(2 μmol/L or 4 μmol/L) and STING inhibitor (H151, 10 μmol/L) for indicated time. **B.** ELISA analysis of Gal-9 in A549 cells concurrently treated with KU-60019(2 μmol/L or 4 μmol/L) and STING inhibitor (H151, 10 μmol/L) for indicated time. **C and D.** RT-qPCR analysis of IFNβ in H157 and A549 cells concurrently treated with KU-60019(2 μmol/L or 4 μmol/L) and STING inhibitor (H151, 10 μmol/L) for indicated time. **E.** ELISA of IFNβ in H157 cells concurrently treated with KU-60019(2 μmol/L or 4 μmol/L) and STING inhibitor (H151, 10 μmol/L) for indicated time. **F.** ELISA analysis of Gal-9 in A549 cells concurrently treated with KU-60019(2 μmol/L or 4 μmol/L) and p-STAT inhibitor (fludarabine, 0.5 μmol/L) for indicated time. n.s., not significant; \*, P < 0.05; \*\*, P < 0.01; \*\*\*, P < 0.001.

**Fig.S5**

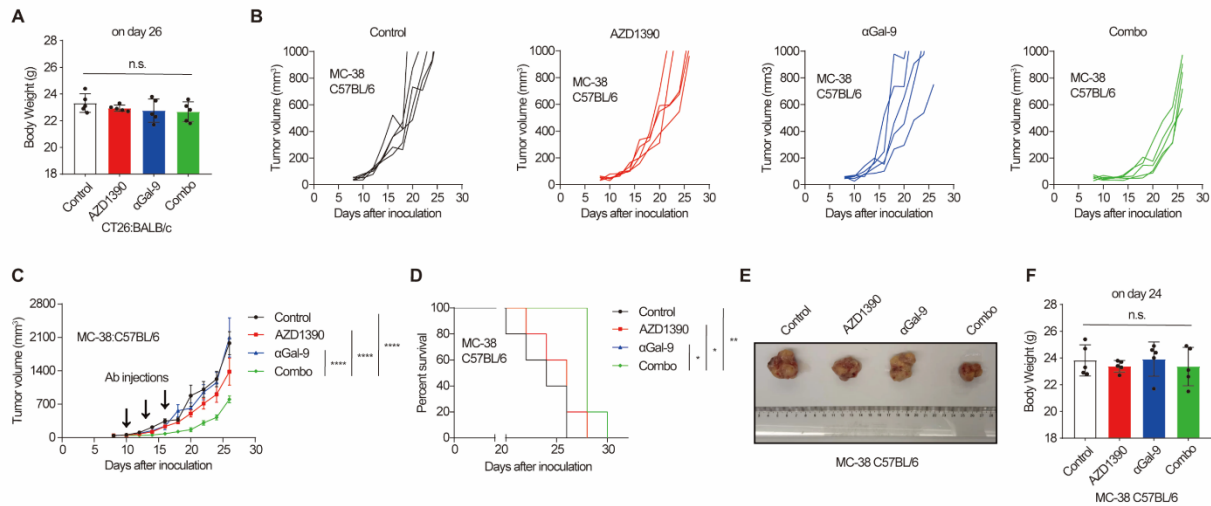

**Fig.S5 Co-inhibition of anti-Gal-9 and ATM significantly reduces tumor growth in MC38 syngeneic mouse model.** **A.** CT26-bearing BALB/c mice were treated as indicated and the body weight was measured on day 26 after tumor inoculation. **B.** Tumor growth curves of individual MC-38-bearing C57BL/6 mice treated with isotype control, then treated with isotype control, ATM inhibitor AZD1390 (5mg/kg for 9 times) alone, anti-Gal-9 antibody (100 $\mu$ g/dose for 3 times) alone, or their combination (n=5 mice/group). **C.** The average tumor growth of mice inoculated with MC-38 tumor cells and subjected to the indicated treatments. Error bars represent SEM of the means. Anti-Gal-9 antibody treatment schedule is indicated by arrows. **D.** Survival curves of mice inoculated with MC-38 tumors and subjected to the indicated treatments. **E.** The size of tumors harvested from individual MC38-bearing C57BL/6 mice treated as indicated after tumor inoculation. **F.** MC-38-bearing C57BL/6 were treated as indicated and the body weight was measured on day 24 after tumor inoculation. n.s., not significant; \*, P < 0.05; \*\*, P < 0.01; \*\*\*, P < 0.001.

**Fig.S6**

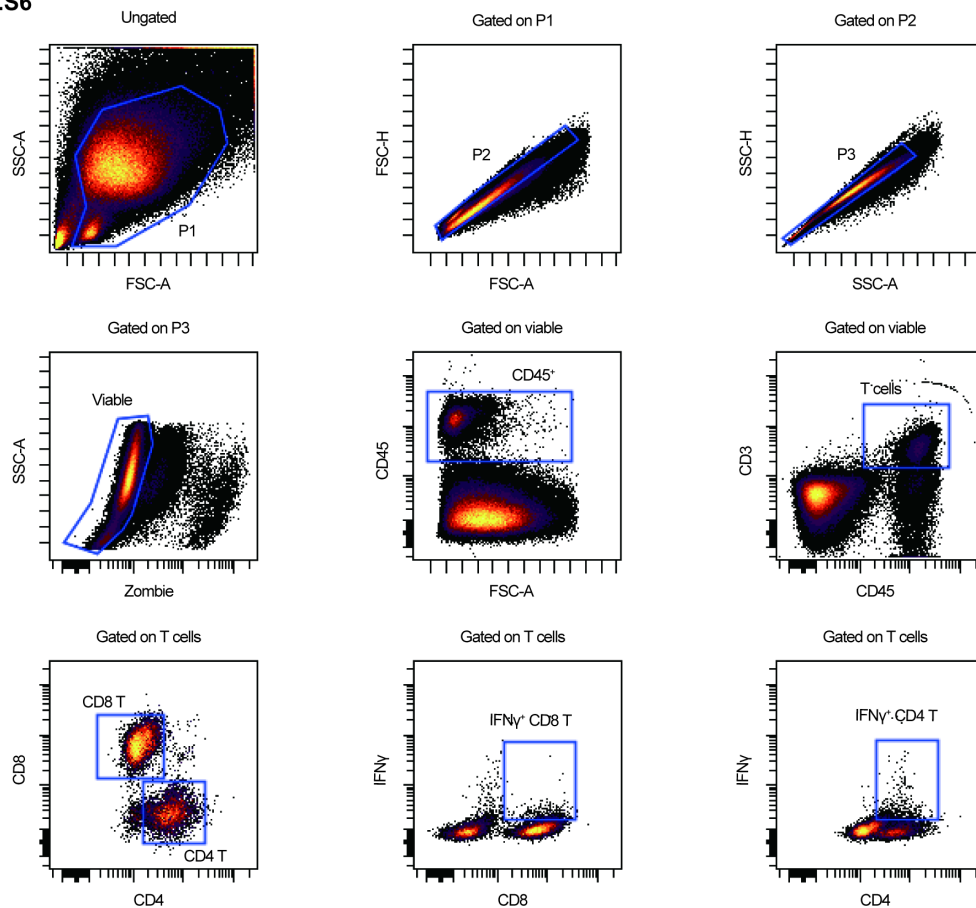

**Fig.S6 Gating strategy for flow cytometric analysis of tumor-infiltrating T cells.** CT26 tumors harvested from BALB/c mice were stained with indicated fluorescence-conjugated antibodies and analyzed by flow cytometry. Data were calculated using the cytobank website.

Supplementary Table S1. Primer sequences for qPCR

| Target gene           | Sequence                |
|-----------------------|-------------------------|
| Human-GAPDH(F)        | GGAGCGAGATCCCTCCAAAAT   |
| Human-GAPDH(R)        | GGCTGTTGTCATACTTCTCATGG |
| Human-galectin-9(F)   | TCTGGGACTATTCAAGGAGGTC  |
| Human-galectin-9(R)   | CCATCTTCAAACCGAGGGTTG   |
| Human-IFN $\beta$ (F) | GCTTGGATTCTACAAAGAAGCA  |
| Human-IFN $\beta$ (R) | ATAGATGGTCAATGCGGCGTC   |
| Human-IFNAR1(F)       | AACAGGAGCGATGAGTCTGTC   |
| Human-IFNAR1(R)       | TGCGAAATGGTGTAATGAGTCA  |
| Mouse-GAPDH(F)        | AGGTCGGTGTGAACGGATTTG   |
| Mouse-GAPDH(R)        | TGTAGACCATGTAGTTGAGGTCA |
| Mouse-galectin-9(F)   | TCAGTGCCCAGTCTCCATACA   |
| Mouse-galectin-9(R)   | CTCCTTGGATTGGTCCAGTAAAG |
| Mouse-IFN $\beta$ (F) | CAGCTCCAAGAAAGGACGAAC   |
| Mouse-IFN $\beta$ (R) | GGCAGTGTAACCTCTTCTGCAT  |
| Mouse-ATM(F)          | GATCTGCTCATTGCTGCCG     |
| Mouse-ATM(R)          | GTGTGGTGGCTGATACATTTGAT |

Supplementary Table S2. shRNA sequences for gene knockdown

| Target gene     | Sequence             |
|-----------------|----------------------|
| Human-STING-sh1 | CCGGATTTCGAACTTACAAT |
| Human-STING-sh2 | ATGGTCATATTACATCGGA  |
| Human-STING-sh3 | TGGCATGGTCATATTACAT  |
| Human-IFNAR1    | TTAGTGATTCATTCCATAT. |
| Mouse-ATM-sh1   | TGAGACAAATAATGTCTTT  |
| Mouse-ATM-sh2   | GTGGAGATTTCTCAATCTT  |
| Mouse-ATM-sh3   | TACTAGAATACGGACATAT  |
